# Supplementary material for: ARCS: scaffolding genome drafts with linked reads
Source: PubMed Central journal article supplement — Bioinformatics. 2017 Oct 23;34(5):725–31. doi: 10.1093/bioinformatics/btx675 (PMC6030987; doi:10.1093/bioinformatics/btx675), 2017-10-23
Supplement: btx675_arcssupplementary_bioinfo.pdf [file btx675_arcssupplementary_bioinfo.pdf]

## ARCS: Scaffolding Genome Drafts with Linked Reads

### Supplementary Information

#### Supplemental Tables

**Table S1. Sequencing data source.** The Illumina paired-end and mate pair sequencing data were used to generate contig and scaffold baseline assemblies with ABySS. The 10x Genomics (10XG) Chromium linked reads were used for assembly with Supernova, or processed for scaffolding the baseline contig and scaffold assemblies with ARCS, Architect and fragScaff.

| Individual | Data type                                            | URL                                                                                                                                                                                                                                                                                                                                   |
|------------|------------------------------------------------------|---------------------------------------------------------------------------------------------------------------------------------------------------------------------------------------------------------------------------------------------------------------------------------------------------------------------------------------|
| NA24143    | Illumina<br>paired-end<br>2x250bp                    | <a href="https://github.com/genome-in-a-bottle/giab_data_indexes/blob/master/AshkenazimTrio/sequence.index.AJtrio_Illumina_2x250bps_06012016">https://github.com/genome-in-a-bottle/giab_data_indexes/blob/master/AshkenazimTrio/sequence.index.AJtrio_Illumina_2x250bps_06012016</a>                                                 |
| NA24143    | Illumina<br>mate-pair<br>6kbp                        | <a href="https://github.com/genome-in-a-bottle/giab_data_indexes/blob/master/AshkenazimTrio/sequence.index.AJtrio_Illumina_6kb_matepair_wgs_08032015">https://github.com/genome-in-a-bottle/giab_data_indexes/blob/master/AshkenazimTrio/sequence.index.AJtrio_Illumina_6kb_matepair_wgs_08032015</a>                                 |
| NA24143    | 10XG<br>Chromium<br>2x151bp<br>(raw <sup>1</sup> )   | <a href="ftp://ftp-trace.ncbi.nlm.nih.gov/giab/ftp/data/AshkenazimTrio/HG004_NA24143_mother/">ftp://ftp-trace.ncbi.nlm.nih.gov/giab/ftp/data/AshkenazimTrio/HG004_NA24143_mother/</a>                                                                                                                                                 |
| NA24143    | 10XG<br>Chromium<br>128/151bp<br>(bam <sup>2</sup> ) | <a href="https://github.com/genome-in-a-bottle/giab_data_indexes/blob/master/AshkenazimTrio/alignment.index.AJtrio_10Xgenomics_ChromiumGenome_GRCh37_GRCh38_06202016">https://github.com/genome-in-a-bottle/giab_data_indexes/blob/master/AshkenazimTrio/alignment.index.AJtrio_10Xgenomics_ChromiumGenome_GRCh37_GRCh38_06202016</a> |
| NA12878    | 10XG<br>Chromium<br>2x151bp<br>(raw <sup>3</sup> )   | <a href="http://support.10xgenomics.com/de-novo-assembly/datasets/msNA12878">http://support.10xgenomics.com/de-novo-assembly/datasets/msNA12878</a>                                                                                                                                                                                   |

<sup>1</sup>Corresponds to Table S3 dataset 1

<sup>2</sup>Corresponds to Table S3 dataset 2

<sup>3</sup>Corresponds to Table S3 dataset 4

**Table S2. Baseline assembly specs.** Contiguity length metrics and number of sequence alignment breakpoints for the baseline ABySS v2.0 contigs and scaffolds obtained from assembling GIAB NA24143 Illumina WGS 2x250 bp paired-end and 6 kbp mate-pair sequence data.

| Assembly Stage | Sequences $\geq 3kbp$ | NG50 (bp) | NGA50 (bp) | Number of breakpoints |
|----------------|-----------------------|-----------|------------|-----------------------|
| contig         | 80,910                | 50,351    | 47,878     | 1,746                 |
| scaffold       | 4,037                 | 4,889,645 | 4,377,837  | 2,923                 |

**Table S3. 10x Genomics Chromium datasets used in our study.** Chromium reads from individuals NA24143 and NA12878 were downloaded (datasets 1, 2 and 4). The sequencing data was converted from a container BAM file (dataset 2) to FASTQ format (dataset 3) or processed with 10XG longranger (Weisenfeld et al., 2016; Zheng et al., 2016) to generate barcode-containing interleaved FASTQ files (dataset 5).

| Dataset | Individual | Processing step                  | Number of read pairs | Read length (bp) | Fold coverage |
|---------|------------|----------------------------------|----------------------|------------------|---------------|
| 1       | NA24143    | Raw reads sequenced <sup>1</sup> | 523,746,206          | 151              | 51.2          |
| 2       | NA24143    | Reads from BAM                   | 420,496,741          | 128/151          | 34.9          |
| 3       | NA24143    | Filtered from BAM <sup>2</sup>   | 305,846,648          | 128/151          | 25.3          |
| 4       | NA12878    | Raw reads sequenced <sup>1</sup> | 1,598,106,419        | 151              | 156.3         |
| 5       | NA12878    | Post Long Ranger <sup>2</sup>    | 1,514,291,941        | 128/151          | 136.8         |

<sup>1</sup>Used with Supernova

<sup>2</sup>Used with ARCS, Architect and fragScaff

**Table S4. ARCS parameters and pertinent LINKS parameters for building the scaffold layout.**

| Module | Parameter | Description                                                    | Recommended range/value      |
|--------|-----------|----------------------------------------------------------------|------------------------------|
| ARCS   | -f        | Genome seq. assembly draft file (Multi-FASTA)                  | NA                           |
| ARCS   | -a        | File of file names listing BAM alignment files                 | NA                           |
| ARCS   | -s        | Min. percent sequence identity to consider reads               | 90-100, default: 98          |
| ARCS   | -c        | Min. number of mapping read pairs/barcode and seq.             | 3-5, default: 5              |
| ARCS   | -l        | Min. number of barcode links to create graph edge <sup>1</sup> | 0-5, default: 0              |
| ARCS   | -z        | Minimum sequence length to consider                            | 250-5000, default: 500       |
| ARCS   | -m        | Barcode read frequency range (min-max)                         | 25-100000, default: 50-10000 |
| ARCS   | -d        | Max. degree of nodes in graph                                  | typically set to 0           |
| ARCS   | -e        | Max. length to consider in 5' and 3' of seq.                   | 10000-60000, default: 30000  |
| ARCS   | -r        | Max. p-val. head/tail and orientation assignments              | 0.05-0.1, default: 0.05      |
| LINKS  | -l        | Min. number of links to consider an edge                       | 3-5, default: 5              |
| LINKS  | -a        | Max. barcode link ratio between two edges at fork              | 0.3-0.9, default: 0.3        |
| LINKS  | -z        | Minimum sequence length to consider                            | 250-1000, default: 500       |

<sup>1</sup>Best handled in LINKS

**Table S5. ARCS contiguity length metrics and breakpoints obtained from scaffolding contigs and scaffolds greater than 3kbp with various parameterizations.** The NG50 and NGA50 lengths were calculated for scaffolds 500 bp and longer. Values in bold are plotted in the manuscript, Fig. 2. In ARCS, We consider ( $-c$  or more) reads that align to the 5' and 3' end ( $-e$  or less) bases of each sequences. The number of read pairs of the same barcode aligning to the head or the tail of a scaffold is tallied, and a binomial test is used to calculate whether the observed distribution is significantly different from a uniform distribution (threshold  $p=0.05$ , parameter  $-r$ ). Once oriented relative to each other, pairs of sequence IDs are passed on to LINKS for generating the scaffold layout. Edges in the graph are considered with sufficient ( $-l$  or more) barcode links. Forks in the graph are resolved by choosing the edge with the most support, and when the ratio of barcode links of the second most supported edge relative to it is equal or below a threshold ( $-a$ ).

| Baseline assembly              | $e$    | $r$  | $c$ | $l$ | $a$ | NG50 (bp)      | NGA50 (bp)     | Breakpoints  |
|--------------------------------|--------|------|-----|-----|-----|----------------|----------------|--------------|
| <b>contig</b> <sup>1</sup>     | 30,000 | 0.05 | 5   | 5   | 0.3 | <b>82,979</b>  | <b>72,782</b>  | <b>1,851</b> |
| contig                         | 30,000 | 0.05 | 5   | 5   | 0.5 | 142,140        | 127,239        | 1,915        |
| <b>contig</b>                  | 30,000 | 0.05 | 5   | 5   | 0.7 | <b>207,455</b> | <b>184,753</b> | <b>1,972</b> |
| <b>contig</b>                  | 30,000 | 0.05 | 5   | 5   | 0.9 | <b>303,034</b> | <b>268,962</b> | <b>2,030</b> |
| <b>scaffold</b> <sup>1,2</sup> | 30,000 | 0.05 | 5   | 5   | 0.3 | <b>11.74e6</b> | <b>7.87e6</b>  | <b>2,985</b> |
| scaffold                       | 30,000 | 0.05 | 5   | 5   | 0.5 | 13.81e6        | 9.05e6         | 2,999        |
| <b>scaffold</b>                | 30,000 | 0.05 | 5   | 5   | 0.7 | <b>15.13e6</b> | <b>10.22e6</b> | <b>3,003</b> |
| <b>scaffold</b>                | 30,000 | 0.05 | 5   | 5   | 0.9 | <b>19.48e6</b> | <b>11.00e6</b> | <b>3,027</b> |
| scaffold                       | 60,000 | 0.05 | 5   | 5   | 0.3 | 13.24e6        | 8.07e6         | 3,016        |
| scaffold                       | 60,000 | 0.05 | 5   | 5   | 0.5 | 15.69e6        | 9.38e6         | 3,033        |

<sup>1</sup>Benchmarking results for the corresponding assemblies are reported in the manuscript, Table 1

<sup>2</sup>The corresponding assembly is depicted in the manuscript, Fig. 3b

**Table S6. fragScaff contiguity length metrics and breakpoints obtained from scaffolding contigs and scaffolds greater than 3kbp with various parameterizations.** The NG50 and NGA50 lengths were calculated for scaffolds 500 bp and longer. Values in bold are plotted in the manuscript, Fig. 2. The parameters  $-E$ ,  $-C$ ,  $-j$ , and  $-u$  respectively control the sequence end node size, the minimum number of reads required to align to a node, the mean number of passing links across nodes and link validity.

| Baseline assembly              | $E$    | $C$ | $j$  | $u$ | NG50 (bp)      | NGA50 (bp)     | Breakpoints  |
|--------------------------------|--------|-----|------|-----|----------------|----------------|--------------|
| contig                         | 5,000  | 5   | 1    | 2   | 313,774        | 253,880        | 5,651        |
| contig                         | 5,000  | 5   | 1    | 3   | 193,266        | 171,334        | 3,263        |
| contig                         | 5,000  | 5   | 1    | 4   | 148,482        | 112,428        | 2,270        |
| contig                         | 5,000  | 5   | 1    | 5   | 85,861         | 76,430         | 2,017        |
| contig                         | 5,000  | 10  | 1    | 2   | 176,775        | 144,624        | 7,592        |
| contig                         | 5,000  | 10  | 1    | 3   | 141,559        | 122,812        | 5,180        |
| contig                         | 5,000  | 10  | 1    | 4   | 102,642        | 92,638         | 3,149        |
| contig                         | 5,000  | 10  | 1    | 5   | 77,145         | 70,639         | 2,301        |
| <b>contig</b>                  | 30,000 | 5   | 1    | 2   | <b>304,926</b> | <b>231,937</b> | <b>6,345</b> |
| <b>contig</b>                  | 30,000 | 5   | 1    | 3   | <b>182,369</b> | <b>160,833</b> | <b>3,393</b> |
| <b>contig</b> <sup>1</sup>     | 30,000 | 5   | 1    | 4   | <b>145,539</b> | <b>130,710</b> | <b>2,622</b> |
| contig                         | 30,000 | 5   | 1    | 5   | 145,539        | 130,710        | 2,622        |
| contig                         | 30,000 | 5   | 2    | 2   | 673,216        | 314,033        | 13,191       |
| contig                         | 30,000 | 5   | 3    | 2   | 1.23e6         | 330,317        | 17,376       |
| scaffold                       | 5,000  | 1   | 1.25 | 2   | 14.13e6        | 6.41e6         | 3,575        |
| scaffold                       | 5,000  | 3   | 1.25 | 2   | 13.98e6        | 6.44e6         | 3,492        |
| scaffold                       | 5,000  | 5   | 1.25 | 2   | 11.85e6        | 6.10e6         | 3,495        |
| scaffold                       | 5,000  | 5   | 1    | 2   | 11.85e6        | 6.10e6         | 3,495        |
| scaffold                       | 5,000  | 5   | 1    | 3   | 11.20e6        | 6.10e6         | 3,435        |
| scaffold                       | 5,000  | 5   | 1    | 4   | 9.57e6         | 5.87e6         | 3,331        |
| scaffold                       | 5,000  | 5   | 2    | 2   | 11.85e6        | 6.10e6         | 3,495        |
| <b>scaffold</b>                | 30,000 | 5   | 1    | 2   | <b>13.13e6</b> | <b>6.41e6</b>  | <b>3,438</b> |
| <b>scaffold</b>                | 30,000 | 5   | 1    | 3   | <b>13.01e6</b> | <b>6.62e6</b>  | <b>3,355</b> |
| <b>scaffold</b> <sup>1,2</sup> | 30,000 | 5   | 1    | 4   | <b>11.74e6</b> | <b>6.52e6</b>  | <b>3,231</b> |
| scaffold                       | 30,000 | 5   | 1    | 5   | 10.55e6        | 6.30e6         | 3,151        |
| scaffold                       | 30,000 | 5   | 2    | 2   | 16.93e6        | 6.52e6         | 3,813        |
| scaffold                       | 30,000 | 5   | 3    | 2   | 16.93e6        | 6.52e6         | 3,813        |

<sup>1</sup>Benchmarking results for the corresponding assemblies are reported in the manuscript, Table 1

<sup>2</sup>The corresponding assembly is depicted in the manuscript, Fig. 3a

**Table S7. Architect contiguity length metrics and breakpoints obtained from scaffolding contigs and scaffolds greater than 3kbp with various parameterizations.** The NG50 and NGA50 lengths were calculated for scaffolds 500 bp and longer. Values in bold are plotted in the manuscript, Fig. 2. The parameters *-t*, *-abs*, *-rel* and *-prun* in Architect control the minimum number of aligned reads from a barcode required for a sequence hit, the minimum number of aligning reads from a given barcode required to create a graph edge, the relative barcode support needed for creating edges and the relative barcode support needed for pruning edges, respectively.

| Baseline assembly     | <i>t</i> | <i>abs</i> | <i>rel</i> | <i>prun</i> | NG50 (bp)     | NGA50 (bp)    | Breakpoints   |
|-----------------------|----------|------------|------------|-------------|---------------|---------------|---------------|
| <b>contig</b>         | 5        | 3          | 0.2        | 0.2         | 59,442        | <b>48,048</b> | <b>10,922</b> |
| <b>contig</b>         | 5        | 3          | 0.3        | 0.2         | 52,502        | <b>47,887</b> | <b>4,035</b>  |
| contig                | 5        | 3          | 0.4        | 0.2         | 50,689        | 47,876        | 2,113         |
| contig                | 5        | 5          | 0.2        | 0.2         | 59,428        | 48,044        | 10,900        |
| contig                | 5        | 5          | 0.3        | 0.2         | 52,499        | 47,887        | 4,030         |
| contig                | 5        | 5          | 0.4        | 0.2         | 50,689        | 47,876        | 2,110         |
| contig                | 10       | 3          | 0.2        | 0.2         | 58,171        | 48,026        | 9,105         |
| contig                | 10       | 3          | 0.3        | 0.2         | 51,951        | 47,880        | 3,297         |
| contig                | 10       | 3          | 0.4        | 0.2         | 50,577        | 47,876        | 1,995         |
| contig                | 10       | 5          | 0.2        | 0.2         | 58,170        | 48,026        | 9,083         |
| contig                | 10       | 5          | 0.3        | 0.2         | 51,948        | 47,880        | 3,292         |
| contig <sup>1</sup>   | 10       | 5          | 0.4        | 0.2         | 50,570        | 47,876        | 1,991         |
| scaffold              | 5        | 3          | 0.1        | 0.1         | 5.48e6        | 4.38e6        | 3,293         |
| scaffold              | 5        | 3          | 0.2        | 0.1         | 5.01e6        | 4.38e6        | 3,076         |
| <b>scaffold</b>       | 5        | 3          | 0.2        | 0.2         | <b>5.01e6</b> | <b>4.38e6</b> | <b>3,076</b>  |
| <b>scaffold</b>       | 5        | 3          | 0.3        | 0.2         | <b>4.93e6</b> | <b>4.38e6</b> | <b>2,991</b>  |
| scaffold              | 5        | 3          | 0.4        | 0.2         | 4.93e6        | 4.38e6        | 2,974         |
| scaffold              | 5        | 5          | 0.2        | 0.2         | 5.01e6        | 4.38e6        | 3,076         |
| scaffold              | 5        | 5          | 0.3        | 0.2         | 4.93e6        | 4.38e6        | 2,991         |
| scaffold <sup>1</sup> | 5        | 5          | 0.4        | 0.2         | 4.93e6        | 4.38e6        | 2,974         |
| scaffold              | 10       | 3          | 0.1        | 0.1         | 5.36e6        | 4.38e6        | 3,216         |
| scaffold              | 10       | 3          | 0.2        | 0.1         | 5.01e6        | 4.38e6        | 3,060         |
| scaffold              | 10       | 3          | 0.2        | 0.2         | 5.01e6        | 4.38e6        | 3,060         |
| scaffold              | 10       | 3          | 0.3        | 0.2         | 4.93e6        | 4.38e6        | 2,981         |
| scaffold              | 10       | 3          | 0.4        | 0.2         | 4.89e6        | 4.38e6        | 2,973         |
| scaffold              | 10       | 5          | 0.2        | 0.2         | 5.01e6        | 4.38e6        | 3,056         |
| scaffold              | 10       | 5          | 0.3        | 0.2         | 4.93e6        | 4.38e6        | 2,981         |
| scaffold              | 10       | 5          | 0.4        | 0.2         | 4.89e6        | 4.38e6        | 2,973         |

<sup>1</sup>Benchmarking results for the corresponding assemblies are reported in the manuscript, Table 1. The parameters were abbreviated to fit the table: *abs*, *rel* and *prun* correspond to *-rc-abs-thr*, *-rc-rel-edge-thr* and *-rc-rel-prun-thr*, respectively

**Table S8. Total wall-clock time and peak memory usage** for ARCS (*-c 5 -e 30000 -r 0.05 -l 5 -a 0.3,0.7,0.9*), Architect (*-t 5 -rc-abs-thr 3 -rc-rel-prun-thr 0.2 -rc-rel-edge-thr 0.2,0.3*, abbreviated to rel) and fragScaff (*-C 5 -E 30000 -j 1 -u 2,3,4*) scaffolding applied to the baseline contig assembly.

| Scaffolder             | ARCS  | ARCS  | ARCS  | fragScaff | fragScaff | fragScaff | Architect | Architect |
|------------------------|-------|-------|-------|-----------|-----------|-----------|-----------|-----------|
| Parameters             | a=0.3 | a=0.7 | a=0.9 | u=2       | u=3       | u=4       | rel=0.2   | rel=0.3   |
| Number of threads      | 1     | 1     | 1     | 64        | 64        | 64        | 1         | 1         |
| Wall-clock time (h:mm) | 1:12  | 1:12  | 1:11  | 6:40      | 6:35      | 6:37      | 190:44    | 187:25    |
| Peak memory (GB)       | 9.4   | 9.4   | 9.4   | 8.1       | 8.1       | 8.1       | 13.3      | 13.2      |

**Table S9. Supernova (SN) assemblies of a human Chromium datasets and comparison to ARCS scaffolding of a human ABySS scaffold assembly.** Values in bold are plotted in the manuscript, Fig. 2b.

| Data-set | Individual     | Assembly               | Cut-off <sup>1</sup><br>size (kbp) | n      | NG50<br>(Mbp) | NGA50<br>(Mbp) | N50<br>(Mbp) | Largest<br>(Mbp) | Break-<br>points |
|----------|----------------|------------------------|------------------------------------|--------|---------------|----------------|--------------|------------------|------------------|
| 4        | NA12878        | 10XG SN v1.0           | 10                                 | 1,231  | 14.66         | 5.27           | 16.40        | 68.87            | 3,737            |
| 4        | NA12878        | Local SN v1.1          | 10                                 | 1,341  | 14.74         | 5.12           | 16.22        | 57.01            | 3,782            |
| 4        | <b>NA12878</b> | <b>Local SN v1.1</b>   | 0.5                                | 21,774 | <b>14.74</b>  | <b>5.12</b>    | 16.10        | 57.01            | <b>3,782</b>     |
| 1        | <b>NA24143</b> | <b>Local SN v1.1</b>   | 0.5                                | 23,693 | <b>13.47</b>  | <b>5.38</b>    | 15.03        | 95.16            | <b>3,879</b>     |
| 3        | NA24143        | ARCS v1.0 <sup>2</sup> | 0.5                                | 64,922 | 19.48         | 11.00          | 21.82        | 97.86            | 3,027            |
| 5        | NA12878        | ARCS v1.0 <sup>3</sup> | 0.5                                | 64,516 | 18.34         | 8.95           | 22.16        | 111.6            | 3,225            |

<sup>1</sup>Cut-off size for reporting the assembly length metrics

<sup>2</sup>Parameters: *-m 50-1000 -s 98 -z 3000 -e 30,000 -r 0.05 -c 5 -l 5 -a 0.9*

<sup>3</sup>Parameters: *-m 50-6000 -s 98 -z 3000 -e 30,000 -r 0.05 -c 5 -l 5 -a 0.9*

**Table S10. Average contiguity and breakpoints analysis of ARCS assemblies.** In triplicate experiments, we sub-sampled Chromium read data and ran ARCS (*-c 5 -r 0.05 -e 30000 -z 3000 -m 50-6000* for NA12878, *-m 50-1000* for NA24143) with LINKS (*-l 5 -a 0.9*) on the baseline scaffold assembly and report the average NG50, NGA50 length metrics, breakpoints and standard deviation (S.D.).

| 10XG Dataset | Read pairs (M) | Fold coverage (Mbp) | NG50 (Mbp) | S.D. (Mbp) | NGA50 (Mbp) | S.D. (Mbp) | Breakpoints (Mbp) | S.D. (Mbp) |
|--------------|----------------|---------------------|------------|------------|-------------|------------|-------------------|------------|
| NA12878      | 45.7           | 4.1                 | 8.0        | 0.3        | 6.1         | 0.1        | 2,956.0           | 11.5       |
| NA12878      | 200.0          | 18.1                | 14.2       | 0.6        | 8.1         | 0.0        | 3,066.0           | 0.0        |
| NA12878      | 400.0          | 36.3                | 15.4       | 1.8        | 8.7         | 0.2        | 3,139.3           | 10.5       |
| NA12878      | 600.0          | 54.4                | 16.4       | 1.4        | 8.7         | 0.2        | 3,170.5           | 2.5        |
| NA12878      | 800.0          | 72.5                | 15.8       | 2.2        | 8.9         | 0.1        | 3,192.0           | 18.5       |
| NA12878      | 1,000.0        | 90.7                | 17.0       | 1.6        | 8.9         | 0.0        | 3,212.0           | 10.4       |
| NA12878      | 1,200.0        | 108.8               | 17.3       | 0.3        | 8.9         | 0.0        | 3,192.0           | 17.2       |
| NA12878      | 1,400.0        | 126.9               | 16.4       | 1.4        | 8.9         | 0.0        | 3,212.0           | 4.0        |
| NA24143      | 100.0          | 8.5                 | 10.8       | 0.1        | 7.5         | 0.4        | 2,963.7           | 10.8       |
| NA24143      | 200.0          | 17.1                | 18.8       | 1.5        | 11.1        | 0.1        | 3,003.3           | 15.7       |
| NA24143      | 300.0          | 25.6                | 19.4       | 0.0        | 11.0        | 0.0        | 3,031.0           | 0.0        |

**Table S11. Average contiguity and breakpoints analysis of Architect assemblies.** In triplicate experiments, we sub-sampled Chromium read data and ran Architect (*-t 5 -rc-abs-thr 3 -rc-rel-edge-thr 0.2 -rc-rel-prun-thr 0.2*) on the baseline scaffold assembly and report the average NG50, NGA50 length metrics, breakpoints and standard deviation (S.D.).

| 10XG Dataset | Read pairs (M) | Fold coverage (Mbp) | NG50 (Mbp) | S.D. (Mbp) | NGA50 (Mbp) | S.D. (Mbp) | Breakpoints (Mbp) | S.D. (Mbp) |
|--------------|----------------|---------------------|------------|------------|-------------|------------|-------------------|------------|
| NA12878      | 45.7           | 4.1                 | 5.0        | 0.0        | 4.4         | 0.0        | 3027.7            | 2.1        |
| NA12878      | 200.0          | 18.1                | 5.5        | 0.0        | 4.4         | 0.0        | 3352.3            | 8.5        |
| NA12878      | 400.0          | 36.3                | 5.5        | 0.0        | 4.4         | 0.0        | 3357.0            | 14.5       |
| NA12878      | 600.0          | 54.4                | 5.5        | 0.0        | 4.4         | 0.0        | 4.6               | 4.6        |
| NA12878      | 800.0          | 72.5                | 5.5        | 0.0        | 4.4         | 0.0        | 4.6               | 4.6        |
| NA12878      | 1000.0         | 90.7                | 5.5        | 0.0        | 4.4         | 0.0        | 5.7               | 5.7        |
| NA12878      | 1200.0         | 108.8               | 5.5        | 0.0        | 4.4         | 0.0        | 7.1               | 7.1        |
| NA12878      | 1400.0         | 126.9               | 5.5        | 0.0        | 4.4         | 0.0        | 0.6               | 0.6        |
| NA24143      | 100.0          | 8.5                 | 4.9        | 0.0        | 4.4         | 0.0        | 2977.3            | 0.6        |
| NA24143      | 200.0          | 17.1                | 5.0        | 0.0        | 4.4         | 0.0        | 3014.7            | 2.3        |
| NA24143      | 300.0          | 25.6                | 5.0        | 0.0        | 4.4         | 0.0        | 3078.0            | 0.0        |

**Table S12. Average contiguity and breakpoints analysis of fragScaff assemblies.** In triplicate experiments, we sub-sampled Chromium read data and ran fragScaff (*-E 30000 -C 5 -j 1 -u 2*) on the baseline scaffold assembly and report the average NG50, NGA50 length metrics, breakpoints and standard deviation (S.D.).

| 10XG<br>Dataset | Read pairs<br>(M) | Fold coverage<br>(Mbp) | NG50<br>(Mbp) | S.D. NG50<br>(Mbp) | NGA50<br>(Mbp) | S.D. NGA50<br>(Mbp) | Breakpoints<br>(Mbp) | S.D. Breakpoints<br>(Mbp) |
|-----------------|-------------------|------------------------|---------------|--------------------|----------------|---------------------|----------------------|---------------------------|
| NA12878         | 45.7              | 4.1                    | 4.9           | 0.1                | 4.4            | 0.0                 | 2921.0               | 3.0                       |
| NA12878         | 200.0             | 18.1                   | 5.6           | 0.1                | 4.6            | 0.1                 | 3236.0               | 8.7                       |
| NA12878         | 400.0             | 36.3                   | 6.5           | 0.3                | 5.1            | 0.1                 | 3329.3               | 50.8                      |
| NA12878         | 600.0             | 54.4                   | 7.0           | 0.2                | 5.3            | 0.0                 | 3352.3               | 25.0                      |
| NA12878         | 800.0             | 72.5                   | 8.3           | 0.3                | 5.6            | 0.1                 | 3468.0               | 94.0                      |
| NA12878         | 1000.0            | 90.7                   | 9.4           | 0.7                | 5.9            | 0.2                 | 3525.3               | 30.9                      |
| NA12878         | 1200.0            | 108.8                  | 10.1          | 0.2                | 6.0            | 0.1                 | 3525.7               | 37.1                      |
| NA12878         | 1400.0            | 126.9                  | 10.5          | 0.3                | 6.1            | 0.1                 | 3539.3               | 34.3                      |
| NA24143         | 100.0             | 8.5                    | 5.0           | 0.1                | 4.4            | 0.0                 | 2919.7               | 3.2                       |
| NA24143         | 200.0             | 17.1                   | 11.5          | 0.1                | 5.8            | 0.1                 | 3293.7               | 18.6                      |
| NA24143         | 300.0             | 25.6                   | 13.1          | 0.0                | 6.4            | 0.0                 | 3456.0               | 0.0                       |



## Supplemental Figures

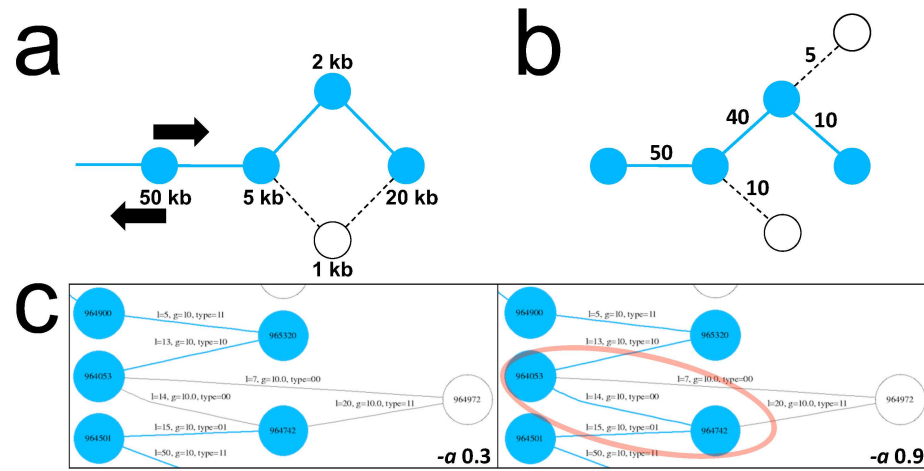

**Fig. S1. LINKS scaffolding.** (a) In the initial phase, the layout is progressively built starting with the largest sequence (left-most vertex), first looking at ARCS pairs in 3' (black arrow, pointing right). Sequences equal or larger than a min. length  $-z$  are considered until possibilities are exhausted (lengths in kbp, 2 kbp cutoff shown). The layout is then extended on the 5' end (black arrow, facing left). The likely path between sequences is shown in blue with the excluded sequence, shorter than the min. length cutoff, shown in the black outline. (b) The parameters  $-l$  (min. number of barcode support required, example numbers above each edge shown) and  $-a$  (max. links ratio) both control extension. In the example,  $-l$  is set to 10 and  $-a$  0.3. At the left-most fork, both vertices are considered. The edge with the highest barcode support is favored, only if the links ratio is below  $-a$ . In the example, the links ratio, calculated as the number of barcodes of the second-most (10) compared to the most (40) supported linkage is  $10/40 = 0.25$  below 0.3 and thus the path with highest support is chosen. At the right-most fork, only the vertex with 10 barcode supports satisfies the  $-l$  cutoff. (c) Scaffold graph sections from scaffolding a draft human genome GIAB HG004 assembly with ARCS while imposing a stringent (left,  $-a$  0.3) or more relaxed (right,  $-a$  0.9) max. links ratio cutoff. Unconnected and connected components are shown in black outline and blue, respectively. The sequence identifier is shown within each vertex. The number of barcodes ( $l=$ ), est. gap size ( $g=$ ) and relative orientation of sequence pairs ( $type=$  with 1,0 for forward and reverse orientations). The ellipse highlights a new linkage.

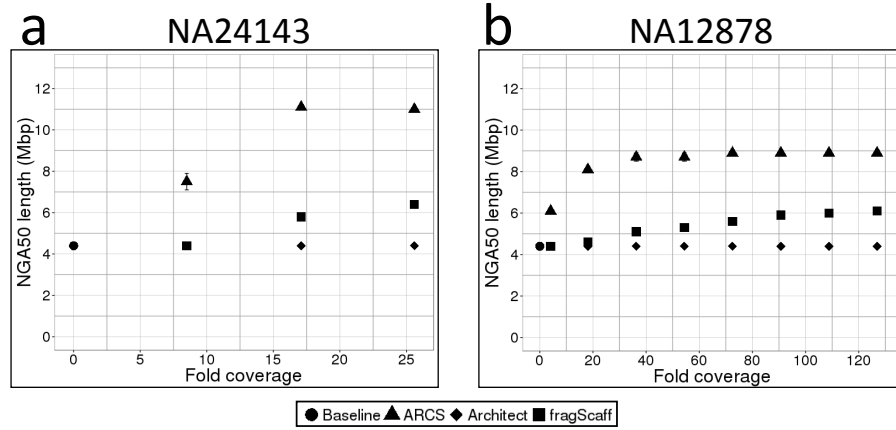

**Fig. S2. ARCS, fragScaff and Architect scaffolding results on sub-sampled 10XG Chromium reads from three independent runs.** In separate, triplicate experiments, we sub-sampled (a) 100, 200, 300M NA24143 and (b) 46, 200-1400M NA12878 10XG read pairs to test the effect of coverage on scaffolding of the baseline scaffold assembly draft using the three scaffolding tools. The pipeline ran on each file subset with ARCS (*-c 5 -r 0.05 -e 30000 -z 3000 -m 50-6000* for NA12878, *-m 50-1000* for NA24143) and LINKS (*-l 5 -a 0.9*), fragScaff (*-E 30000 -C 5 -j 1 -u 2*) and Architect (*-t 5 -rc-abs-thr 3 -rc-rel-edge-thr 0.2 -rc-rel-prun-thr 0.2*).

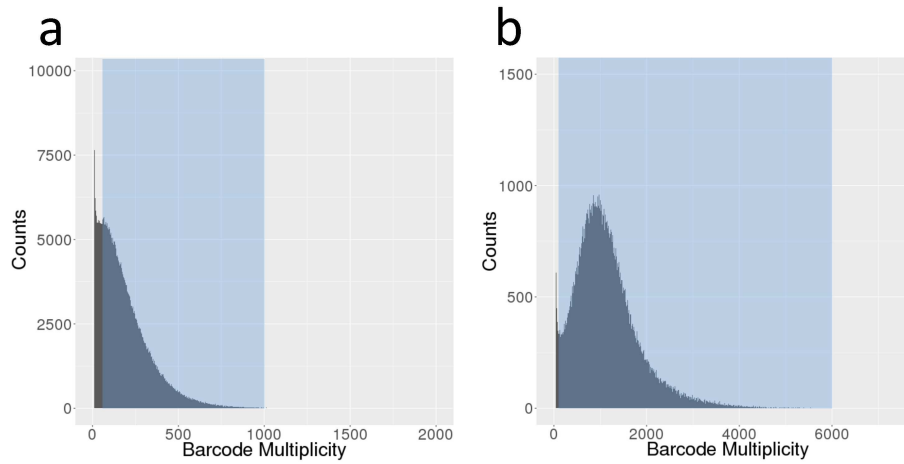

**Fig. S3. Distributions of barcode-read multiplicities (read frequency per index) in human (a) NA24143 and (b) NA12878 Chromium datasets.** Blue shades show the multiplicity range we set in ARCS as *-m 50-1000* and *-m 50-6000* for the NA24143 and NA12878 Chromium sequence data, respectively.
